# Supplementary material for: Tungsten doping reinforced structural stability of single-crystal nickel-rich LiNi0.9Co0.1O2 cathodes
Source: Royal Society of Chemistry journal article supplement (doi:10.1039/d4ta07391f), 2025-01-01
Supplement: d4ta07391f1.pdf [file d4ta07391f1.pdf]

## Supporting Information

# Tungsten Doping Reinforced Structure Stability of Single-Crystal Nickel-Rich $\text{LiNi}_{0.9}\text{Co}_{0.1}\text{O}_2$ Cathode

Zhen Xiao <sup>a, †, \*</sup>, Anqi Chen <sup>b, †</sup>, Ruojian Ma <sup>b</sup>, Yongquan Zheng <sup>b</sup>, Xiao-Dong Qi <sup>c</sup>, Yu-Jie Guo <sup>c, \*</sup>, Ruyi Fang <sup>b</sup>, Yongping Gan <sup>b</sup>, Xinping He <sup>b</sup>, Xiaoxiao Lu <sup>d</sup>, Jianping Xu <sup>e</sup>, Hui Huang <sup>b</sup>, Jun Zhang <sup>b</sup>, Xinhui Xia <sup>b</sup>, Wenkui Zhang <sup>b</sup>, Sen Xin <sup>c, \*</sup>, Yang Xia <sup>b, \*</sup>

<sup>a</sup> Key Laboratory of Rare Earth Optoelectronic Materials and Devices of Zhejiang Province, Institute of Optoelectronic Materials and Devices, China Jiliang University, Hangzhou, 310018, China

<sup>b</sup> College of Materials Science and Engineering, Zhejiang University of Technology, Hangzhou, 310014, China

<sup>c</sup> CAS Key Laboratory of Molecular Nanostructure and Nanotechnology, Institute of Chemistry, Chinese Academy of Sciences (CAS), Beijing 100190, P. R. China

<sup>d</sup> School of Materials Science and Engineering, Zhejiang Sci-Tech University, Hangzhou, 310018, China

<sup>e</sup> Evercos Battery Co. Ltd., Suichang 323300, China

<sup>†</sup> These authors contributed equally to this work.

\* Corresponding authors: xiaozhen@cjlu.edu.cn (Z. Xiao); guoyujie@iccas.ac.cn (Y.-J. Guo); xinsen08@iccas.ac.cn (S. Xin); nanoshine@zjut.edu.cn (Y. Xia)

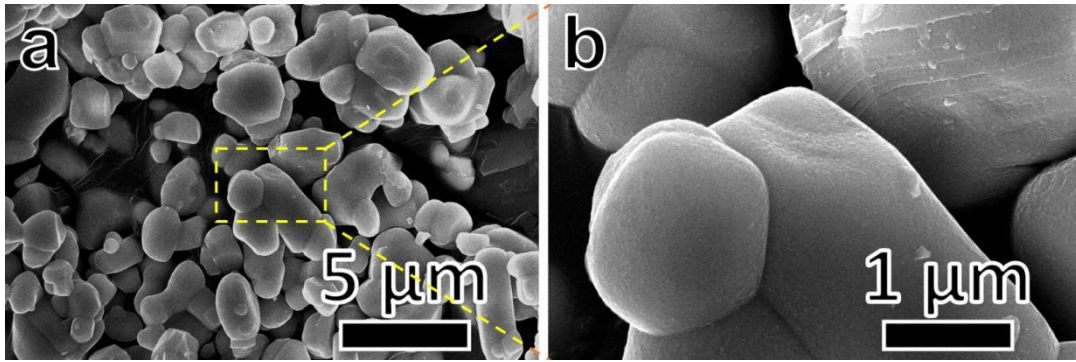

**Figure S1.** SEM images of pristine NC9010 after calcination at 750 °C for 4 h.

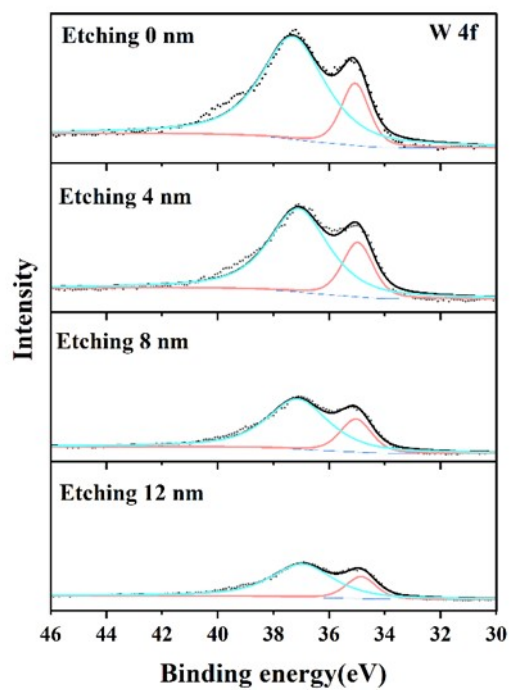

**Figure S2.** The XPS depth profile with etching 0, 4, 8, 12nm.

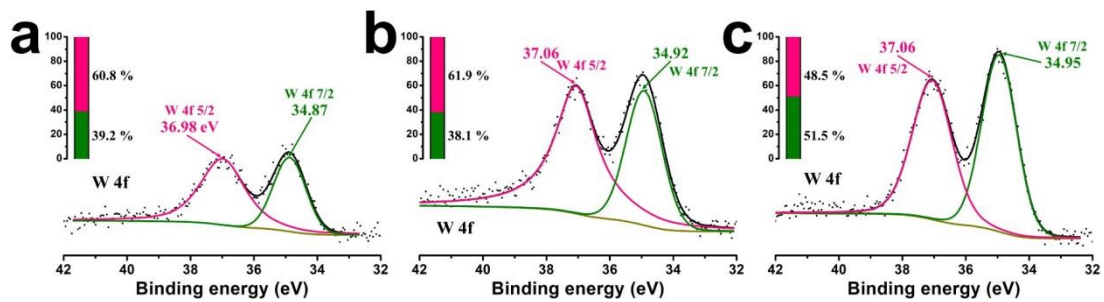

**Figure S3.** XPS results of W 4f regions in W-doping samples: (a) 0.3 mol% W doping, (b) 0.6 mol% W doping, and (c) 0.9 mol% W doping.

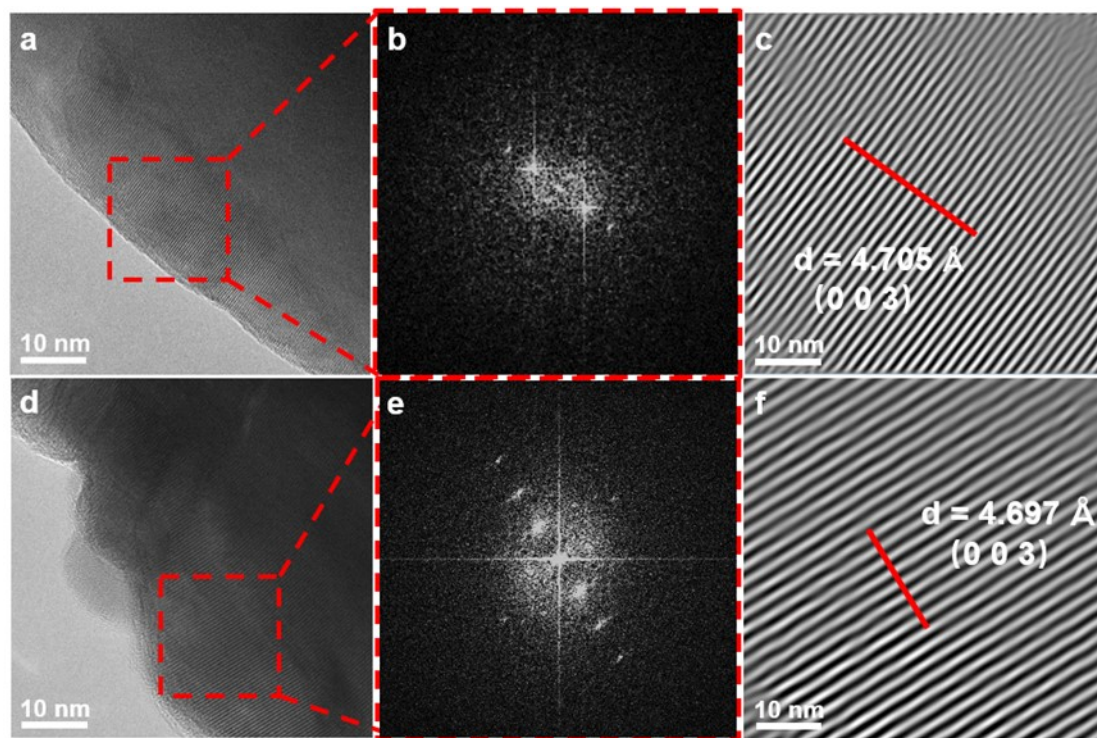

**Figure S4.** The HRTEM analysis for pristine (a-c) and 0.6 mol% W-doping sample (d-f).

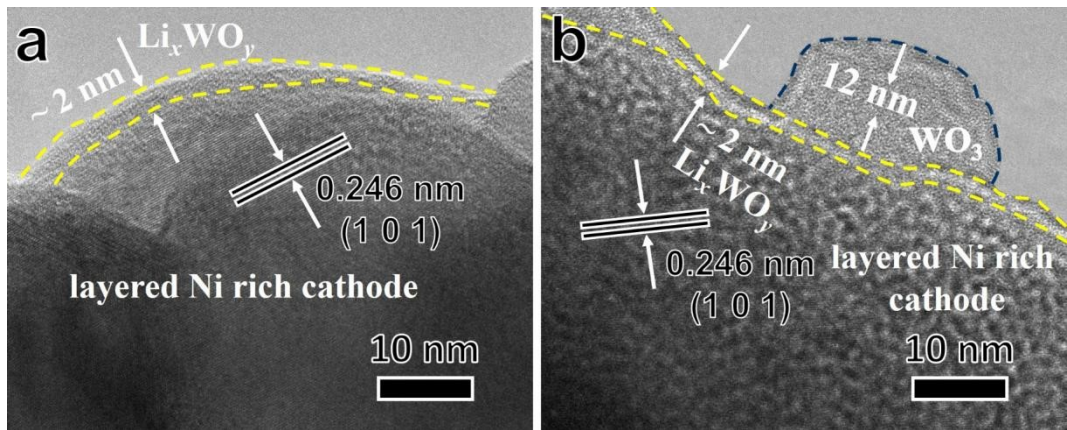

**Figure S5.** HRTEM images of (a) 0.6 mol% W doping and (b) 0.9 mol% W doping.

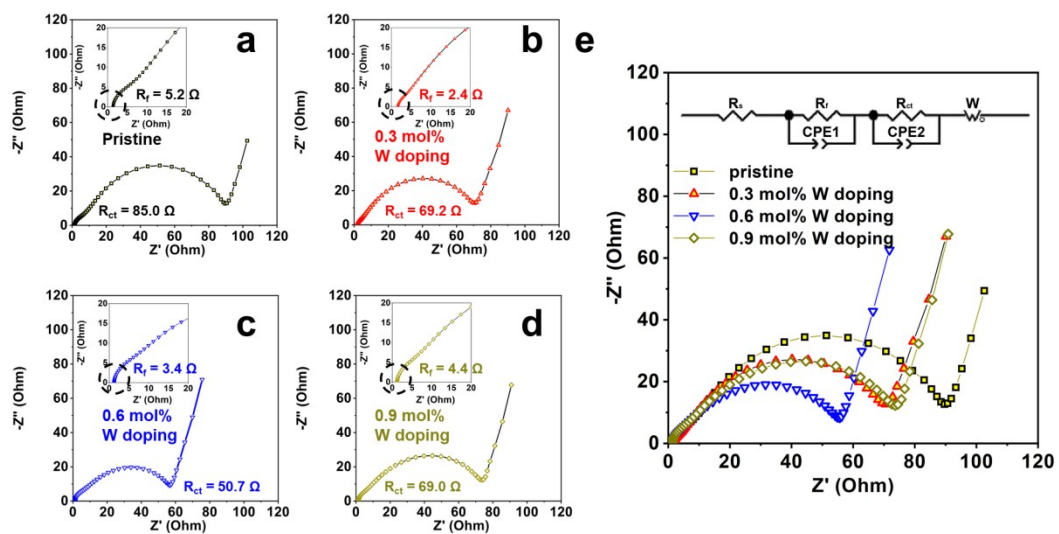

Figure S6. EIS curves and fitting analysis results of each sample before cycling (SOC = 0).

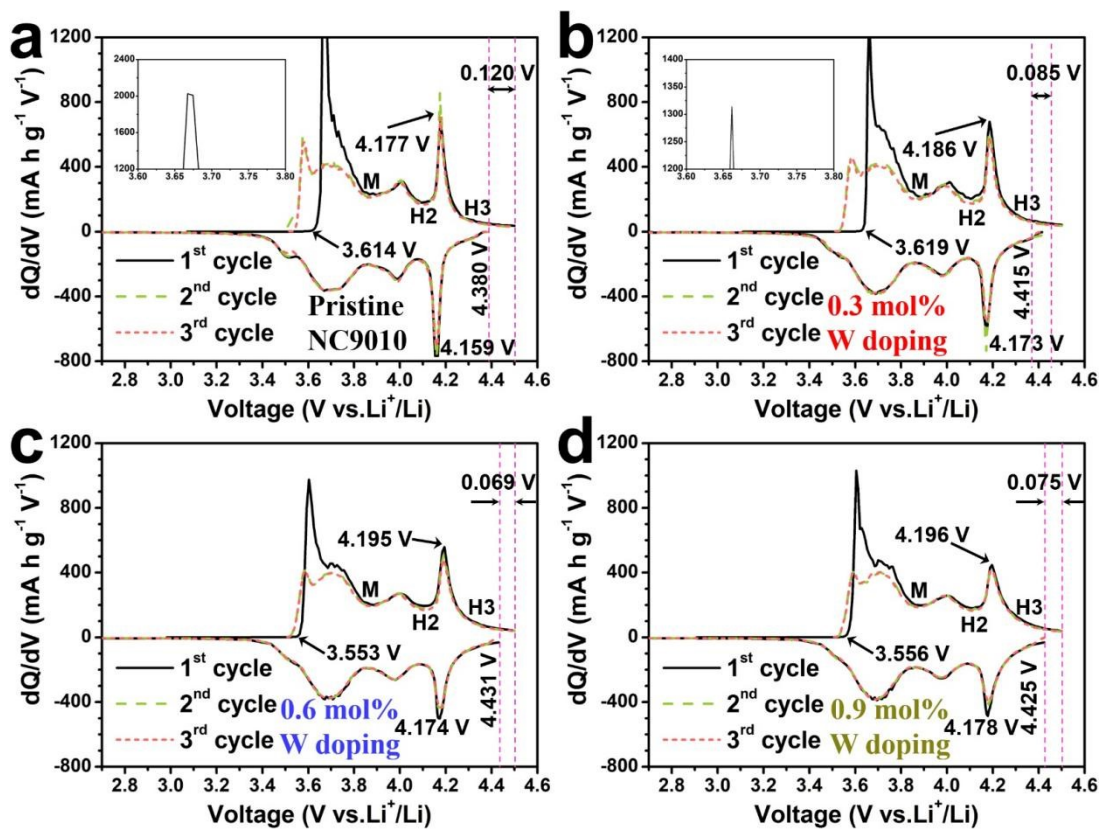

**Figure S7.** Differential capacity vs voltage curves for initial three cycles of (a) pristine, (b) 0.3 % W doping, (c) 0.6 % W doping, and (d) 0.9 % W doping.



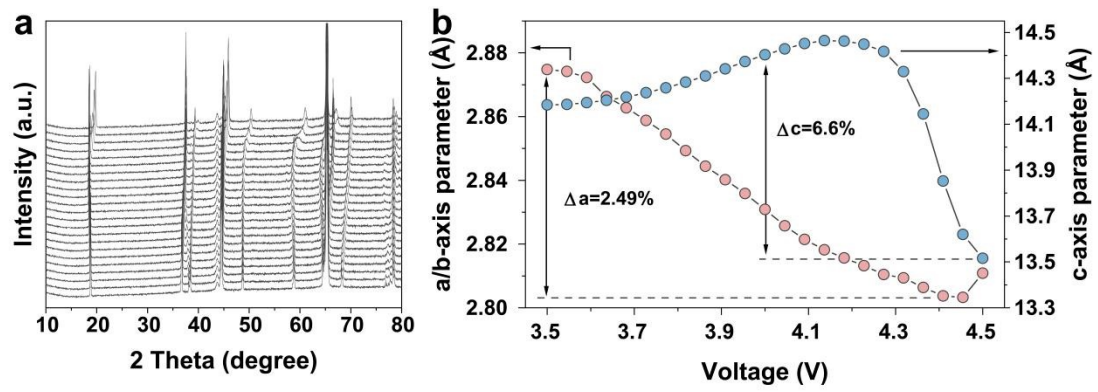

**Figure S8.** (a) *In-situ* XRD patterns during first charging process of pristine sample and (b) corresponding lattice parameter variations.

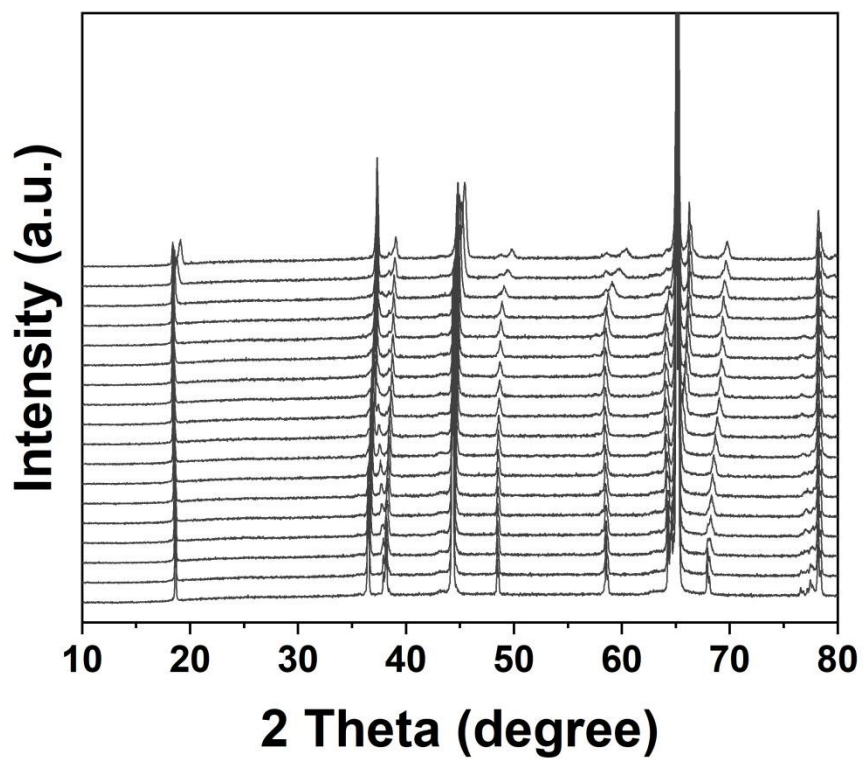

**Figure S9.** *In-situ* XRD patterns during first charging process of 0.6 mol% W-doping sample.

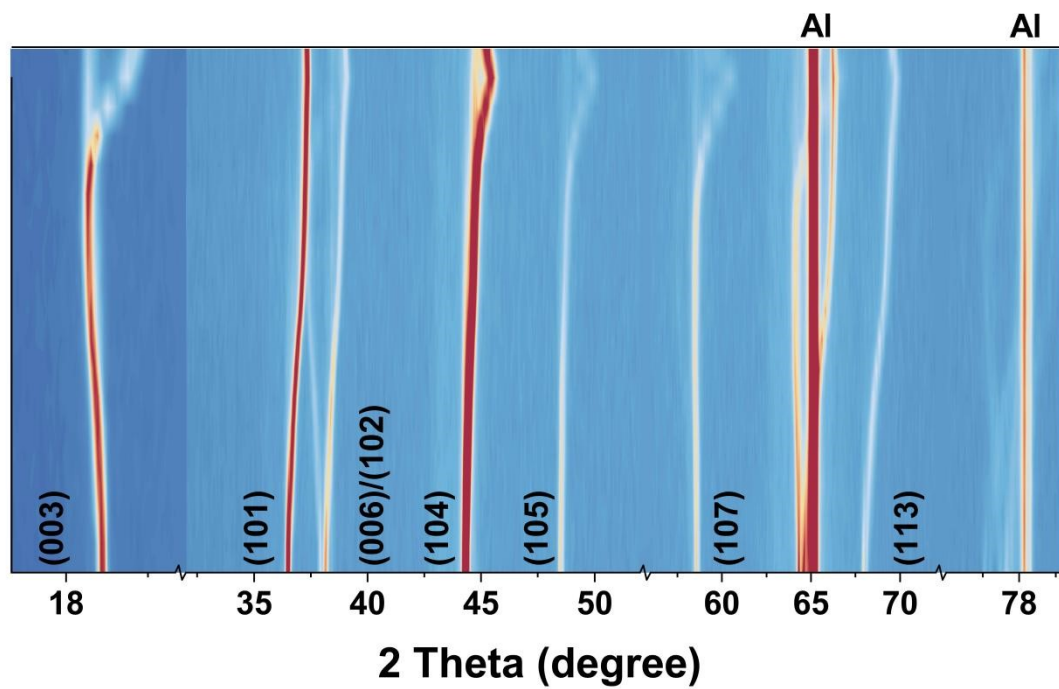

**Figure S10.** *In-situ* XRD patterns with contour plots of 0.6 mol% W-doping sample during first charging process.

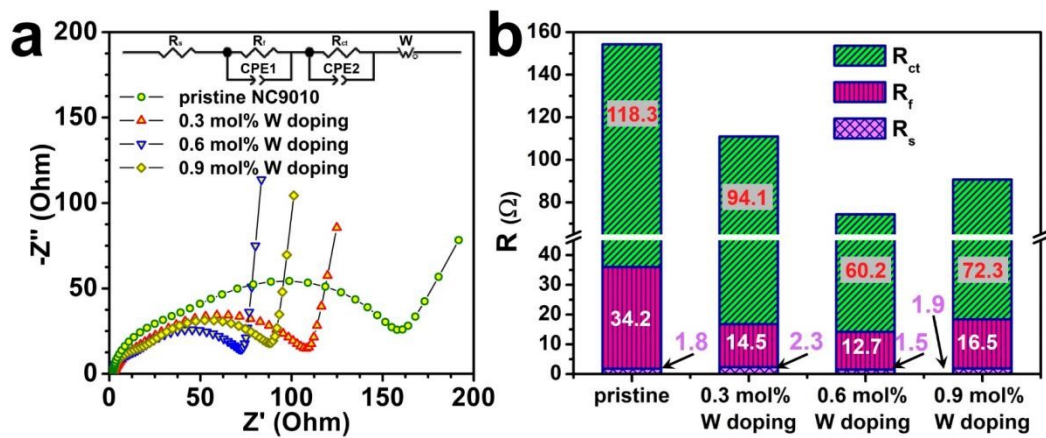

Figure S11. (a) EIS curves and (b) fitting analysis results of samples after 200 cycles (SOC = 0).

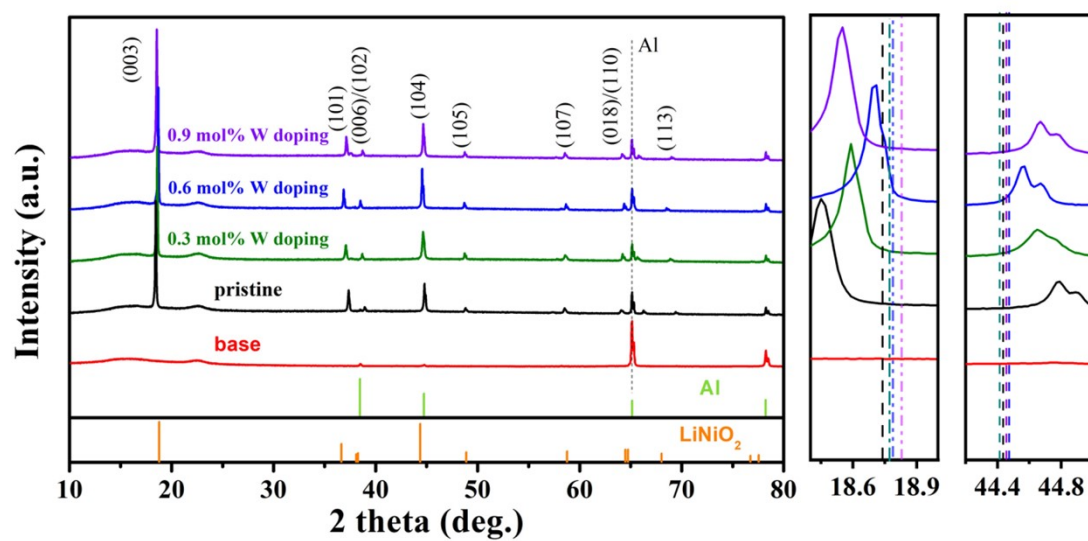

**Figure S12.** XRD patterns of cathodes after cycling at 0.5 C.

**Table S1.** The (003) and (104) peaks shift of various samples after cycles

| Sample            | (003)                | (104)                |
|-------------------|----------------------|----------------------|
| Pristine          | decrease 0.27 degree | increase 0.37 degree |
| 0.3 mol% W doping | decrease 0.15 degree | increase 0.25 degree |
| 0.6 mol% W doping | decrease 0.03 degree | increase 0.13 degree |
| 0.9 mol% W doping | decrease 0.21 degree | increase 0.25 degree |
